# Supplementary material for: Two neuropeptides that promote blood feeding in Anopheles stephensi mosquitoes
Source: eLife journal article supplement (doi:10.7554/elife.108625), 2025-10-21
Supplement: supp1 [file elife-108625-supp1-v1.pdf]

## **GLMM analysis of feeding behaviours in *An. stephensi* females (figure 1D, E)**

Data from D0 (day of emergence) were excluded from the GLMM analysis because newly emerged females show no feeding behaviour on this day, resulting in no variance in the response variable to model.

### **Model 1: Whether the experimental groups differ in blood-feeding behaviour across age?**

Random variables: BiOID (replicate identity), larval.batch (larval batch)

Fixed variables: Day(age), Group (co-housed vs virgin)

```
model1 <- glmer(Bloodfed_binary ~ Day * Group + (1|BiOID) + (1|larval.batch),  
               data = mosquito_data_filtered,  
               family = binomial)
```

### **Model summary:**

| Characteristic     | Odds | Probability (%) | OR <sup>1</sup> | 95% CI     | p-value          |
|--------------------|------|-----------------|-----------------|------------|------------------|
| <b>Day</b>         |      |                 |                 |            |                  |
| D1                 | 1.41 | 58.5            | —               | —          |                  |
| D2                 | 2.67 | 72.8            | 1.90**          | 1.29, 2.81 | <b>0.001</b>     |
| D3                 | 4.87 | 83.0            | 3.47***         | 2.25, 5.35 | <b>&lt;0.001</b> |
| D4                 | 6.35 | 86.4            | 4.52***         | 2.86, 7.13 | <b>&lt;0.001</b> |
| D5                 | 4.64 | 82.3            | 3.30***         | 2.15, 5.08 | <b>&lt;0.001</b> |
| <b>Group</b>       |      |                 |                 |            |                  |
| co-housed          | 1.41 | 58.5            | —               | —          |                  |
| virgin             | 1.20 | 54.5            | 0.86            | 0.59, 1.23 | 0.403            |
| <b>Day * Group</b> |      |                 |                 |            |                  |
| D2 * virgin        | 2.44 | 70.9            | 1.74            | 0.99, 3.05 | 0.053            |
| D3 * virgin        | 0.95 | 48.7            | 0.68            | 0.38, 1.21 | 0.189            |
| D4 * virgin        | 0.56 | 35.9            | 0.40**          | 0.22, 0.72 | <b>0.002</b>     |
| D5 * virgin        | 0.90 | 47.4            | 0.64            | 0.36, 1.14 | 0.130            |

<sup>1</sup> \*p<0.05; \*\*p<0.01; \*\*\*p<0.001

Abbreviations: CI = Confidence Interval, OR = Odds Ratio

## Post-hoc analysis via estimated marginal means (EM means)

### 1) Age-effects within each group (p-value adjustment: Tukey's method)

Group = co-housed:

| contrast | estimate | SE    | df  | z.ratio | p.value |
|----------|----------|-------|-----|---------|---------|
| D1 - D2  | -0.6423  | 0.199 | Inf | -3.234  | 0.0107  |
| D1 - D3  | -1.2432  | 0.221 | Inf | -5.614  | <.0001  |
| D1 - D4  | -1.5085  | 0.233 | Inf | -6.479  | <.0001  |
| D1 - D5  | -1.1946  | 0.220 | Inf | -5.429  | <.0001  |
| D2 - D3  | -0.6009  | 0.228 | Inf | -2.638  | 0.0637  |
| D2 - D4  | -0.8662  | 0.242 | Inf | -3.577  | 0.0032  |
| D2 - D5  | -0.5523  | 0.229 | Inf | -2.416  | 0.1111  |
| D3 - D4  | -0.2653  | 0.261 | Inf | -1.018  | 0.8473  |
| D3 - D5  | 0.0485   | 0.248 | Inf | 0.196   | 0.9997  |
| D4 - D5  | 0.3138   | 0.262 | Inf | 1.199   | 0.7521  |

Group = virgin:

| contrast | estimate | SE    | df  | z.ratio | p.value |
|----------|----------|-------|-----|---------|---------|
| D1 - D2  | -1.1958  | 0.210 | Inf | -5.697  | <.0001  |
| D1 - D3  | -0.8564  | 0.201 | Inf | -4.262  | 0.0002  |
| D1 - D4  | -0.5857  | 0.192 | Inf | -3.050  | 0.0194  |
| D1 - D5  | -0.7529  | 0.199 | Inf | -3.791  | 0.0014  |
| D2 - D3  | 0.3394   | 0.220 | Inf | 1.542   | 0.5353  |
| D2 - D4  | 0.6100   | 0.216 | Inf | 2.826   | 0.0379  |
| D2 - D5  | 0.4429   | 0.221 | Inf | 2.007   | 0.2625  |
| D3 - D4  | 0.2706   | 0.207 | Inf | 1.308   | 0.6859  |
| D3 - D5  | 0.1035   | 0.211 | Inf | 0.491   | 0.9882  |
| D4 - D5  | -0.1671  | 0.207 | Inf | -0.806  | 0.9288  |

Results are given on the log odds ratio (not the response) scale.  
P value adjustment: tukey method for comparing a family of 5 estimates

## 2) Pair-wise comparison at each day (p-value adjustment: Bonferroni method)

Day = D1:

| contrast             | estimate | SE    | df  | z.ratio | p.value |
|----------------------|----------|-------|-----|---------|---------|
| (co-housed) - virgin | 0.156    | 0.186 | Inf | 0.836   | 0.4034  |

Day = D2:

| contrast             | estimate | SE    | df  | z.ratio | p.value |
|----------------------|----------|-------|-----|---------|---------|
| (co-housed) - virgin | -0.398   | 0.217 | Inf | -1.830  | 0.0672  |

Day = D3:

| contrast             | estimate | SE    | df  | z.ratio | p.value |
|----------------------|----------|-------|-----|---------|---------|
| (co-housed) - virgin | 0.542    | 0.228 | Inf | 2.376   | 0.0175  |

Day = D4:

| contrast             | estimate | SE    | df  | z.ratio | p.value |
|----------------------|----------|-------|-----|---------|---------|
| (co-housed) - virgin | 1.078    | 0.236 | Inf | 4.570   | <.0001  |

Day = D5:

| contrast             | estimate | SE    | df  | z.ratio | p.value |
|----------------------|----------|-------|-----|---------|---------|
| (co-housed) - virgin | 0.597    | 0.225 | Inf | 2.656   | 0.0079  |

Results are given on the log odds ratio (not the response) scale.

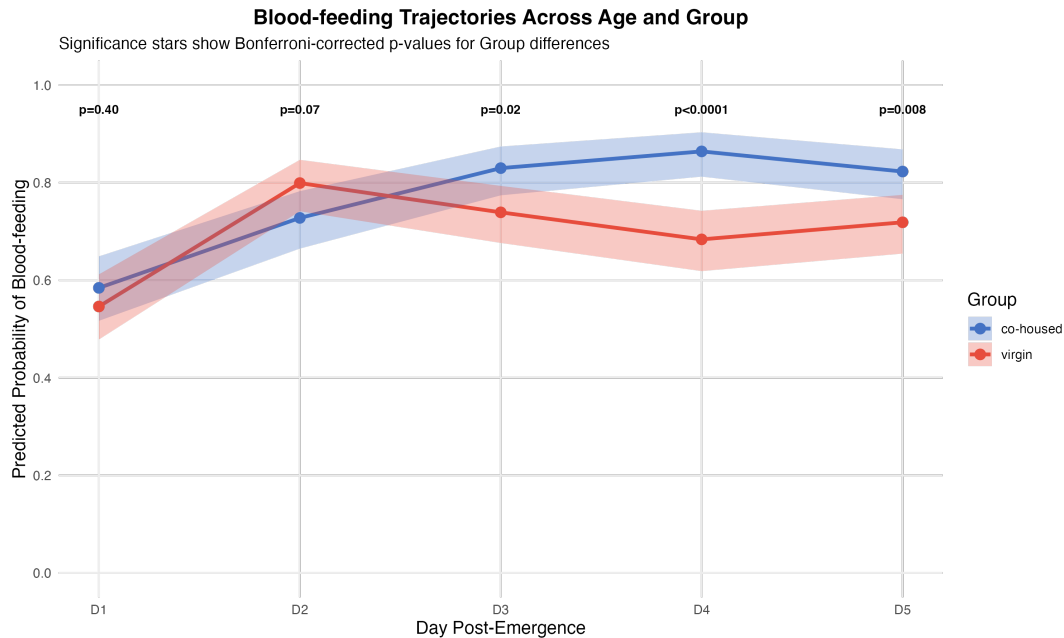

**Conclusions:** Blood-feeding probability of co-housed females increases with age. This trend is weaker in virgins.

Mated females feed significantly higher than virgins as they age (D3-D5), the differences being most pronounced on D4.

## Model 2: Effect of mating on the blood-feeding behaviour of co-housed females

Random variables: BioID (replicate identity)

Fixed variables: Day(age), Mating status (yes or no)

```
model2 <- glmer(Bloodfed_binary ~ Day * Mating + (1|BioID),  
               data = mated_only,  
               family = binomial)
```

### Model summary:

| Characteristic      | Odds | Probability (%) | OR <sup>†</sup> | 95% CI     | p-value      |
|---------------------|------|-----------------|-----------------|------------|--------------|
| <b>Day</b>          |      |                 |                 |            |              |
| D1                  | 1.37 | 57.8            | —               | —          |              |
| D2                  | 2.14 | 68.2            | 1.56            | 1.00, 2.46 | 0.052        |
| D3                  | 2.23 | 69.0            | 1.63            | 0.87, 3.06 | 0.130        |
| D4                  | 4.23 | 80.9            | 3.09*           | 1.21, 7.88 | <b>0.018</b> |
| D5                  | 1.54 | 60.6            | 1.12            | 0.18, 6.89 | 0.902        |
| <b>Mating</b>       |      |                 |                 |            |              |
| n                   |      |                 | —               | —          |              |
| y                   | 2.63 | 72.5            | 1.92            | 0.49, 7.46 | 0.347        |
| <b>Day * Mating</b> |      |                 |                 |            |              |
| D2 * y              | 1.22 | 55.0            | 0.89            | 0.20, 3.92 | 0.878        |
| D3 * y              | 2.18 | 68.6            | 1.59            | 0.34, 7.42 | 0.555        |
| D4 * y              | 1.14 | 53.3            | 0.83            | 0.16, 4.42 | 0.827        |
| D5 * y              | 2.28 | 69.5            | 1.67            | 0.17, 16.2 | 0.660        |

<sup>†</sup> \*p<0.05; \*\*p<0.01; \*\*\*p<0.001

Abbreviations: CI = Confidence Interval, OR = Odds Ratio

## Post-hoc analysis via estimated marginal means (EM means)

### Effect of mating (y) on each day (p-value adjustment: Bonferroni method)

Day = D1:

| contrast | estimate | SE    | df  | z.ratio | p.value |
|----------|----------|-------|-----|---------|---------|
| y - n    | 0.651    | 0.693 | Inf | 0.939   | 0.3475  |

Day = D2:

| contrast | estimate | SE    | df  | z.ratio | p.value |
|----------|----------|-------|-----|---------|---------|
| y - n    | 0.535    | 0.301 | Inf | 1.777   | 0.0756  |

Day = D3:

| contrast | estimate | SE    | df  | z.ratio | p.value |
|----------|----------|-------|-----|---------|---------|
| y - n    | 1.115    | 0.368 | Inf | 3.027   | 0.0025  |

Day = D4:

| contrast | estimate | SE    | df  | z.ratio | p.value |
|----------|----------|-------|-----|---------|---------|
| y - n    | 0.464    | 0.504 | Inf | 0.920   | 0.3575  |

Day = D5:

| contrast | estimate | SE    | df  | z.ratio | p.value |
|----------|----------|-------|-----|---------|---------|
| y - n    | 1.162    | 0.934 | Inf | 1.245   | 0.2133  |

Results are given on the log odds ratio (not the response) scale.

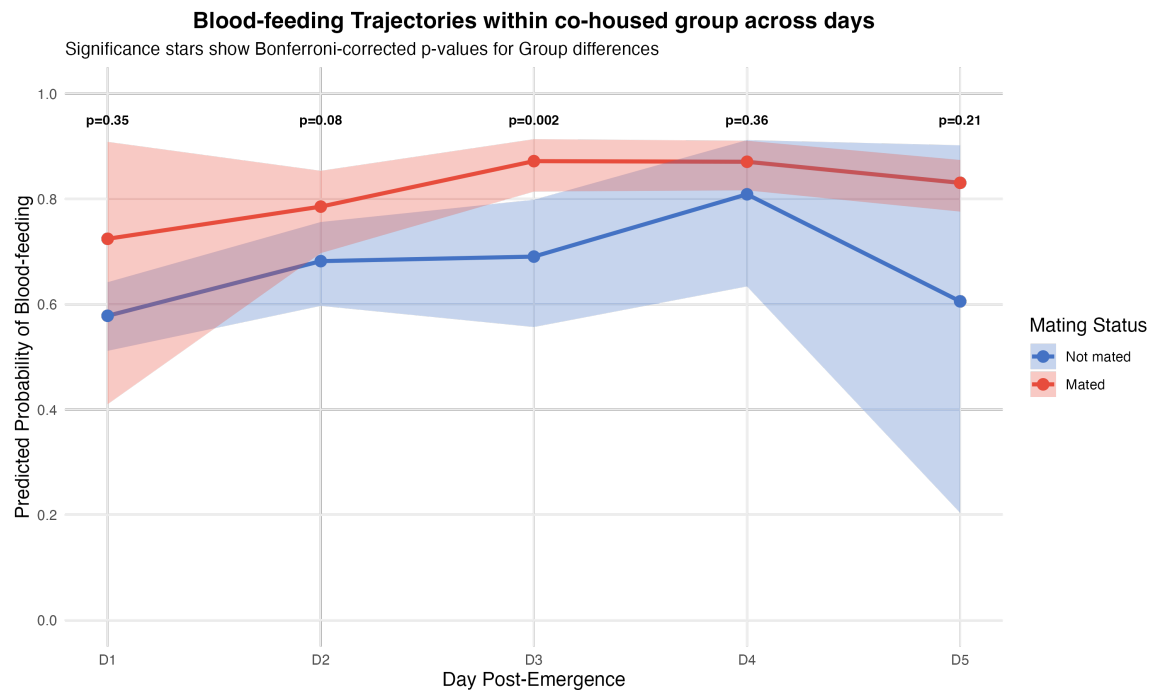

**Conclusions:** Within co-housed females, mating status shows only a brief, significant effect on blood-feeding on D3. The pronounced differences observed in the blood-feeding behaviour of virgin and co-housed females on Days 4-5 (model 1) appear to be mediated by male presence rather than mating per se, as mated and unmated females within the co-housed group show no significant differences during these time points.

### Model 3: Whether the experimental groups differ in their second-blood meal, across age?

Random variables: BioID (replicate identity)

Fixed variables: Day(age), Group (co-housed vs virgin)

```
model3 <- glmer(Bloodfed_binary ~ Day * Group + (1|BioID),  
               data = mosquito_data,  
               family = binomial)
```

#### Model summary:

| Characteristic     | Odds | Probability (%) | OR <sup>†</sup> | 95% CI     | p-value          |
|--------------------|------|-----------------|-----------------|------------|------------------|
| <b>Day</b>         |      |                 |                 |            |                  |
| DB1                | 0.51 | 33.8            | —               | —          |                  |
| DB2                | 0.21 | 17.4            | 0.41***         | 0.29, 0.60 | <b>&lt;0.001</b> |
| DB3                | 0.65 | 39.4            | 1.28            | 0.92, 1.78 | 0.143            |
| DB4                | 0.40 | 28.6            | 0.78            | 0.55, 1.10 | 0.154            |
| <b>Group</b>       |      |                 |                 |            |                  |
| co-housed          | 0.51 | 33.8            | —               | —          |                  |
| virgin             | 4.35 | 81.3            | 8.58***         | 5.81, 12.7 | <b>&lt;0.001</b> |
| <b>Day * Group</b> |      |                 |                 |            |                  |
| DB2 * virgin       | 1.47 | 59.5            | 2.90***         | 1.67, 5.02 | <b>&lt;0.001</b> |
| DB3 * virgin       | 0.47 | 32.0            | 0.92            | 0.54, 1.55 | 0.748            |
| DB4 * virgin       | 0.97 | 49.2            | 1.91*           | 1.11, 3.28 | <b>0.020</b>     |

<sup>†</sup> \*p<0.05; \*\*p<0.01; \*\*\*p<0.001

Abbreviations: CI = Confidence Interval, OR = Odds Ratio

(note: PBM abbreviated as “B”)

**Post-hoc analysis via estimated marginal means (EM means)**

**1) Age-effects within each group (p-value adjustment: Tukey's method)**

Group = co-housed:

| contrast  | estimate | SE    | df  | z.ratio | p.value |
|-----------|----------|-------|-----|---------|---------|
| DB1 - DB2 | 0.8849   | 0.188 | Inf | 4.703   | <.0001  |
| DB1 - DB3 | -0.2477  | 0.169 | Inf | -1.467  | 0.4579  |
| DB1 - DB4 | 0.2499   | 0.175 | Inf | 1.424   | 0.4841  |
| DB2 - DB3 | -1.1326  | 0.174 | Inf | -6.498  | <.0001  |
| DB2 - DB4 | -0.6350  | 0.180 | Inf | -3.524  | 0.0024  |
| DB3 - DB4 | 0.4976   | 0.161 | Inf | 3.092   | 0.0107  |

Group = virgin:

| contrast  | estimate | SE    | df  | z.ratio | p.value |
|-----------|----------|-------|-----|---------|---------|
| DB1 - DB2 | -0.1790  | 0.210 | Inf | -0.852  | 0.8296  |
| DB1 - DB3 | -0.1619  | 0.210 | Inf | -0.773  | 0.8667  |
| DB1 - DB4 | -0.3952  | 0.217 | Inf | -1.822  | 0.2629  |
| DB2 - DB3 | 0.0171   | 0.202 | Inf | 0.085   | 0.9998  |
| DB2 - DB4 | -0.2162  | 0.210 | Inf | -1.032  | 0.7308  |
| DB3 - DB4 | -0.2332  | 0.209 | Inf | -1.117  | 0.6792  |

Results are given on the log odds ratio (not the response) scale.  
P value adjustment: tukey method for comparing a family of 4 estimates

**2) Pair-wise comparison at each day (p-value adjustment: Bonferroni method)**

|                      |          |       |     |         |         |
|----------------------|----------|-------|-----|---------|---------|
| Day = DB1:           |          |       |     |         |         |
| contrast             | estimate | SE    | df  | z.ratio | p.value |
| (co-housed) - virgin | -2.15    | 0.199 | Inf | -10.800 | <.0001  |
| Day = DB2:           |          |       |     |         |         |
| contrast             | estimate | SE    | df  | z.ratio | p.value |
| (co-housed) - virgin | -3.21    | 0.199 | Inf | -16.129 | <.0001  |
| Day = DB3:           |          |       |     |         |         |
| contrast             | estimate | SE    | df  | z.ratio | p.value |
| (co-housed) - virgin | -2.06    | 0.180 | Inf | -11.492 | <.0001  |
| Day = DB4:           |          |       |     |         |         |
| contrast             | estimate | SE    | df  | z.ratio | p.value |
| (co-housed) - virgin | -2.79    | 0.194 | Inf | -14.397 | <.0001  |

Results are given on the log odds ratio (not the response) scale.

(note: PBM abbreviated as "B")

### Blood-feeding Trajectories post-blood-meal Across Age and Group

Significance stars show Bonferroni-corrected p-values for Group differences

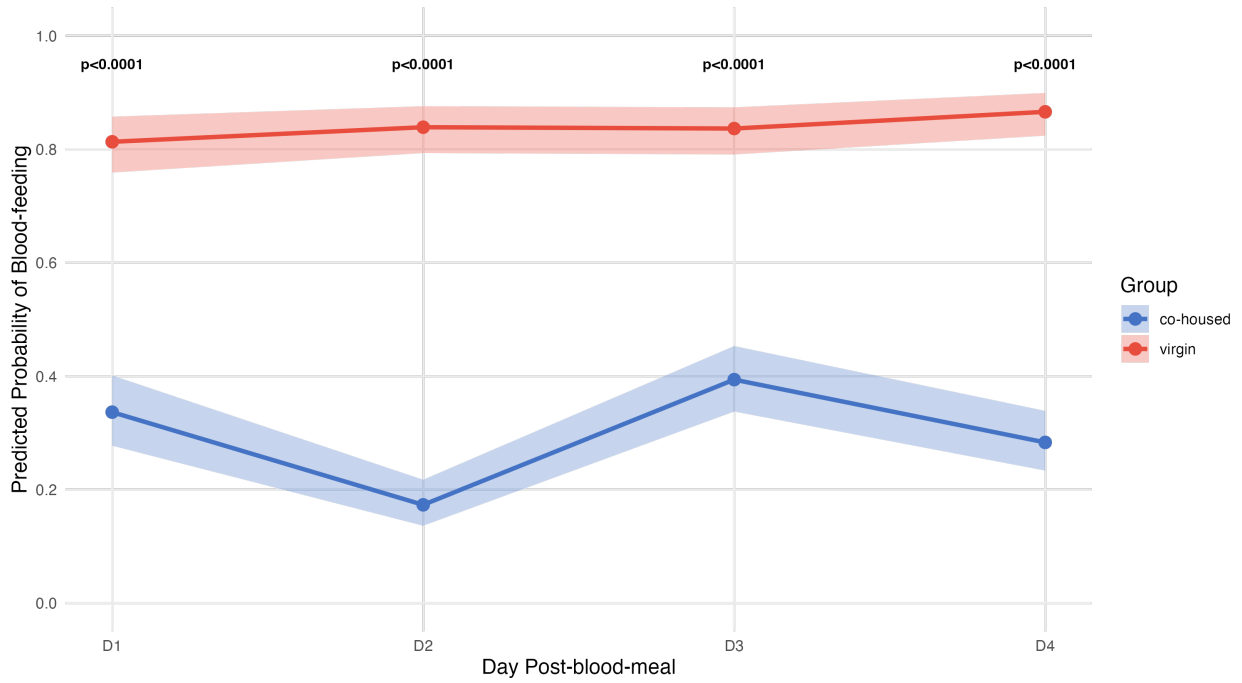

**Conclusions:** Co-housed and virgin females show markedly different appetites, post-blood meal. Co-housed females (assumed mated), show a strong sustained suppression, while virgins continue to feed with high propensity, at least up to 4 days after a replete blood meal.

#### **Model 4: Whether the experimental groups differ in sugar-feeding behaviour across age?**

Random variables: BiID (replicate identity)

Fixed variables: Day(age), Group (co-housed vs virgin)

```
model4 <- glmer(Sugar.fed_binary ~ Day * Group + (1|BiID),  
  data = mosquito_data_filtered,  
  family = binomial)
```

#### **Model summary:**

| Characteristic     | Odds  | Probability (%) | OR <sup>1</sup> | 95% CI     | p-value |
|--------------------|-------|-----------------|-----------------|------------|---------|
| <b>Day</b>         |       |                 |                 |            |         |
| D1                 | 0.41  | 29.1            | —               | —          |         |
| D2                 | 12.37 | 92.5            | 30.1***         | 15.6, 57.9 | <0.001  |
| D3                 | 17.88 | 94.7            | 43.4***         | 20.6, 91.8 | <0.001  |
| D4                 | 33.53 | 97.1            | 81.5***         | 31.6, 210  | <0.001  |
| D5                 | 28.03 | 96.6            | 68.1***         | 28.3, 164  | <0.001  |
| <b>Group</b>       |       |                 |                 |            |         |
| co-housed          | 0.41  | 29.1            | —               | —          |         |
| virgin             | 0.88  | 46.8            | 2.13***         | 1.38, 3.27 | <0.001  |
| <b>Day * Group</b> |       |                 |                 |            |         |
| D2 * virgin        | 0.21  | 17.4            | 0.51            | 0.21, 1.23 | 0.134   |
| D3 * virgin        | 0.09  | 8.3             | 0.21***         | 0.09, 0.52 | <0.001  |
| D4 * virgin        | 0.16  | 13.8            | 0.39            | 0.12, 1.30 | 0.126   |
| D5 * virgin        | 0.15  | 13.0            | 0.37            | 0.12, 1.13 | 0.080   |

<sup>1</sup> \*p<0.05; \*\*p<0.01; \*\*\*p<0.001

Abbreviations: CI = Confidence Interval, OR = Odds Ratio

## Post-hoc analysis via estimated marginal means (EM means)

### 1) Age-effects within each group (p-value adjustment: Tukey's method)

Group = co-housed:

| contrast | estimate | SE    | df  | z.ratio | p.value |
|----------|----------|-------|-----|---------|---------|
| D1 - D2  | -3.403   | 0.334 | Inf | -10.185 | <.0001  |
| D1 - D3  | -3.771   | 0.382 | Inf | -9.884  | <.0001  |
| D1 - D4  | -4.400   | 0.484 | Inf | -9.093  | <.0001  |
| D1 - D5  | -4.221   | 0.448 | Inf | -9.421  | <.0001  |
| D2 - D3  | -0.368   | 0.448 | Inf | -0.823  | 0.9238  |
| D2 - D4  | -0.997   | 0.537 | Inf | -1.855  | 0.3419  |
| D2 - D5  | -0.818   | 0.506 | Inf | -1.617  | 0.4861  |
| D3 - D4  | -0.629   | 0.568 | Inf | -1.106  | 0.8032  |
| D3 - D5  | -0.449   | 0.538 | Inf | -0.835  | 0.9198  |
| D4 - D5  | 0.179    | 0.615 | Inf | 0.292   | 0.9984  |

Group = virgin:

| contrast | estimate | SE    | df  | z.ratio | p.value |
|----------|----------|-------|-----|---------|---------|
| D1 - D2  | -2.737   | 0.296 | Inf | -9.238  | <.0001  |
| D1 - D3  | -2.224   | 0.256 | Inf | -8.685  | <.0001  |
| D1 - D4  | -3.454   | 0.387 | Inf | -8.916  | <.0001  |
| D1 - D5  | -3.225   | 0.354 | Inf | -9.114  | <.0001  |
| D2 - D3  | 0.514    | 0.337 | Inf | 1.525   | 0.5461  |
| D2 - D4  | -0.717   | 0.445 | Inf | -1.613  | 0.4887  |
| D2 - D5  | -0.488   | 0.416 | Inf | -1.173  | 0.7668  |
| D3 - D4  | -1.231   | 0.419 | Inf | -2.937  | 0.0274  |
| D3 - D5  | -1.001   | 0.388 | Inf | -2.579  | 0.0743  |
| D4 - D5  | 0.230    | 0.485 | Inf | 0.474   | 0.9897  |

Results are given on the log odds ratio (not the response) scale.

P value adjustment: tukey method for comparing a family of 5 estimates

### 2) Pair-wise comparison at each day (p-value adjustment: Bonferroni method)

| contrast             | estimate | SE    | df  | z.ratio | p.value |
|----------------------|----------|-------|-----|---------|---------|
| (co-housed) - virgin | -0.7546  | 0.219 | Inf | -3.441  | 0.0006  |

Day = D2:

| contrast             | estimate | SE    | df  | z.ratio | p.value |
|----------------------|----------|-------|-----|---------|---------|
| (co-housed) - virgin | -0.0887  | 0.392 | Inf | -0.226  | 0.8210  |

Day = D3:

| contrast             | estimate | SE    | df  | z.ratio | p.value |
|----------------------|----------|-------|-----|---------|---------|
| (co-housed) - virgin | 0.7932   | 0.407 | Inf | 1.950   | 0.0512  |

Day = D4:

| contrast             | estimate | SE    | df  | z.ratio | p.value |
|----------------------|----------|-------|-----|---------|---------|
| (co-housed) - virgin | 0.1911   | 0.582 | Inf | 0.328   | 0.7426  |

Day = D5:

| contrast             | estimate | SE    | df  | z.ratio | p.value |
|----------------------|----------|-------|-----|---------|---------|
| (co-housed) - virgin | 0.2413   | 0.529 | Inf | 0.456   | 0.6485  |

Results are given on the log odds ratio (not the response) scale.

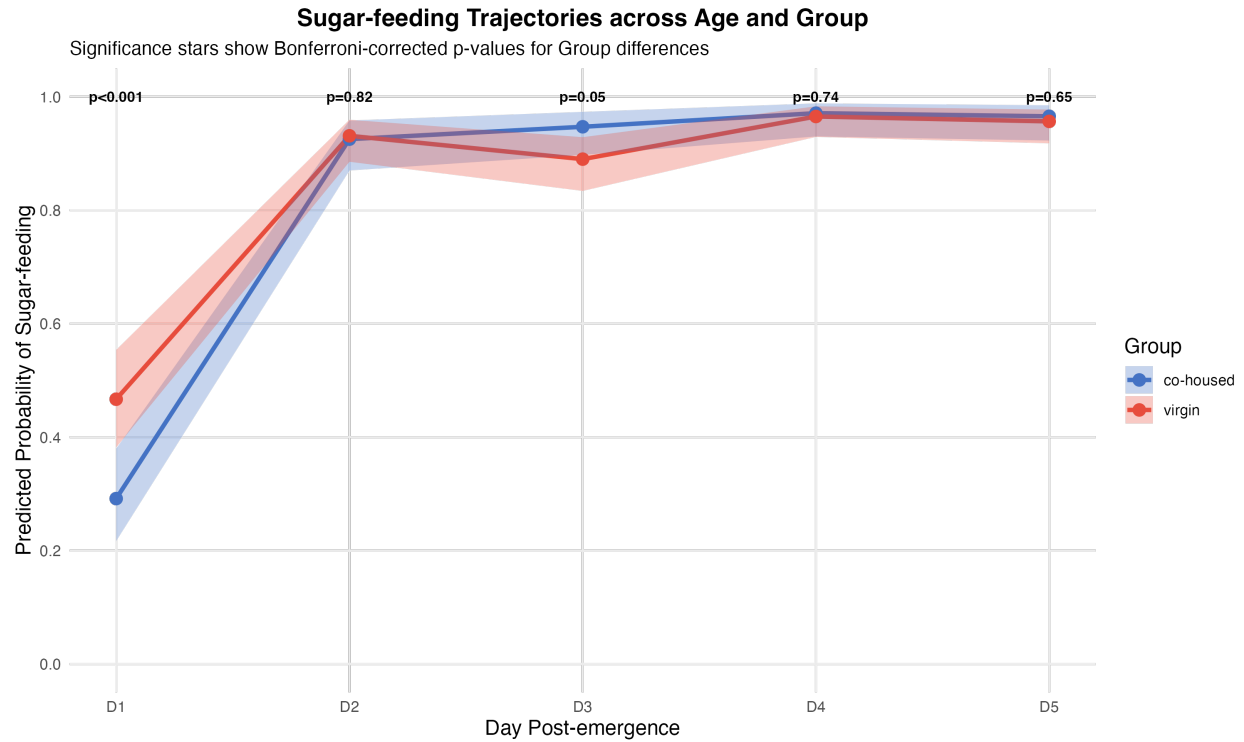

**Conclusions:** Both virgins and co-housed females show a sharp increase in their sugar-appetite from D1 to D2, followed by stabilization through D5.

Sugar-feeding behaviours are largely comparable between groups, across days. Virgin females demonstrated significantly higher initial feeding probability compared to co-housed females (D1). This difference was eliminated by D2 and remained non-significant thereafter.

## Model 5: Effect of mating on the sugar-feeding behaviour of co-housed females

Random variables: BioID (replicate identity)

Fixed variables: Day(age), Mating status (yes or no)

```
model5 <- glmer(Sugar.fed_binary ~ Day * Mating + (1|BioID),
  data = mated_only,
  family = binomial)
```

### Model summary:

| Characteristic      | Odds        | Probability (%) | OR <sup>†</sup> | 95% CI                                                                                                            | p-value |
|---------------------|-------------|-----------------|-----------------|-------------------------------------------------------------------------------------------------------------------|---------|
| <b>Day</b>          |             |                 |                 |                                                                                                                   |         |
| D1                  | 0.42        | 29.6            | —               | —                                                                                                                 |         |
| D2                  | 7.75        | 88.6            | 18.4***         | 8.19, 41.5                                                                                                        | <0.001  |
| D3                  | 2.98        | 74.9            | 7.08***         | 2.64, 19.0                                                                                                        | <0.001  |
| D4                  | 6.48        | 86.6            | 15.4***         | 4.32, 55.1                                                                                                        | <0.001  |
| D5                  | 13511668.03 | 100.0           | 32,155,341      | 0.00, 458,391,919,179,031,447,577,326,110,191,003,156,070,149,023,901,469,250,371,113,818,366,346,793,494,511,616 | 0.841   |
| <b>Mating</b>       |             |                 |                 |                                                                                                                   |         |
| n                   |             |                 | —               | —                                                                                                                 |         |
| y                   | 1.70        | 63.0            | 4.05            | 0.92, 17.9                                                                                                        | 0.065   |
| <b>Day * Mating</b> |             |                 |                 |                                                                                                                   |         |
| D2 * y              | 0.28        | 21.9            | 0.67            | 0.10, 4.44                                                                                                        | 0.682   |
| D3 * y              | 1.76        | 63.8            | 4.18            | 0.52, 33.8                                                                                                        | 0.180   |
| D4 * y              | 1.24        | 55.4            | 2.95            | 0.27, 31.7                                                                                                        | 0.373   |
| D5 * y              | 0.00        | 0.0             | 0.00            | 0.00, 7,248,915,324,456,836,893,750,989,915,264,405,095,298,755,374,445,726,709,201,567,219,712                   | 0.866   |

<sup>†</sup> \*p<0.05; \*\*p<0.01; \*\*\*p<0.001  
Abbreviations: CI = Confidence Interval, OR = Odds Ratio

## Post-hoc analysis via estimated marginal means (EM means)

### Effect of mating (yes) on each day (p-value adjustment: Bonferroni method)

Day = D1:

| contrast | estimate | SE    | df  | z.ratio | p.value |
|----------|----------|-------|-----|---------|---------|
| y - n    | 1.40     | 0.757 | Inf | 1.846   | 0.0648  |

Day = D2:

| contrast | estimate | SE    | df  | z.ratio | p.value |
|----------|----------|-------|-----|---------|---------|
| y - n    | 1.00     | 0.596 | Inf | 1.684   | 0.0921  |

Day = D3:

| contrast | estimate | SE    | df  | z.ratio | p.value |
|----------|----------|-------|-----|---------|---------|
| y - n    | 2.83     | 0.754 | Inf | 3.753   | 0.0002  |

Day = D4:

| contrast | estimate | SE    | df  | z.ratio | p.value |
|----------|----------|-------|-----|---------|---------|
| y - n    | 2.48     | 0.946 | Inf | 2.620   | 0.0088  |

Day = D5:

| contrast | estimate | SE     | df  | z.ratio | p.value |
|----------|----------|--------|-----|---------|---------|
| y - n    | -13.08   | 85.900 | Inf | -0.152  | 0.8790  |

Results are given on the log odds ratio (not the response) scale.

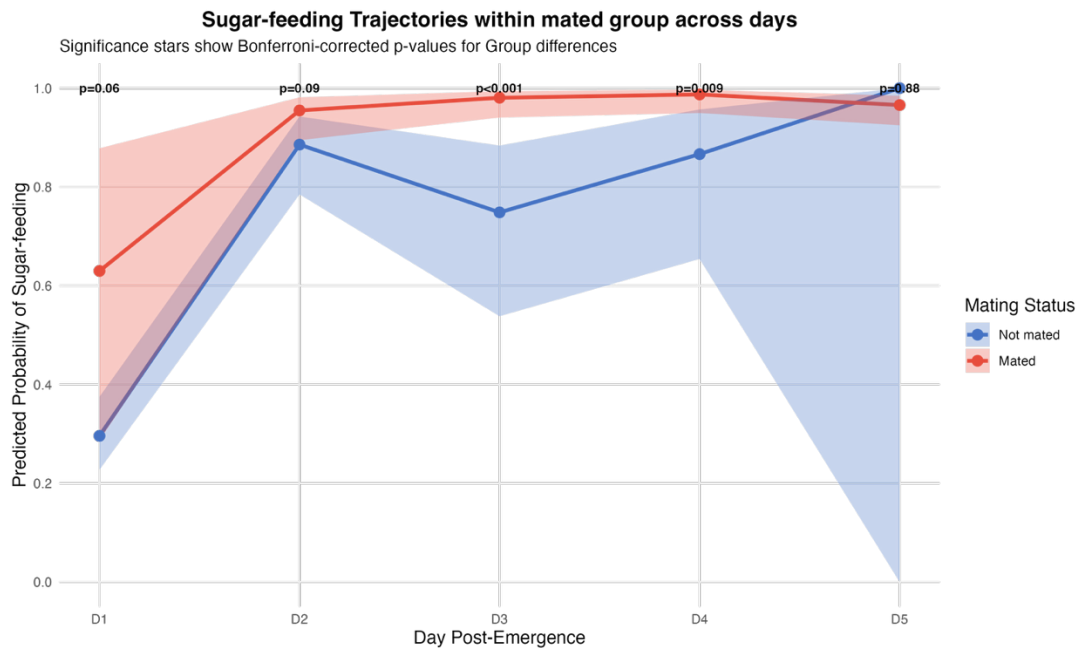

**Conclusions:** Mating status shows only a brief, significant effect on sugar-feeding on D3 and D4 within co-housed females: mating positively influences sugar-feeding on these days. However, it is interesting to note that no differences were observed in the feeding behaviour of virgins and co-housed females (model 4) on these days. As mating sharply increases from D2 to D4, it possibly creates maximum differences on these days within the co-housed group, which are then cancelled out when averaged together.

**Model 6: Whether the experimental groups differ in their sugar-feeding behaviour, post-blood meal, across age?**

Random variables: BioID (replicate identity)

Fixed variables: Day(age), Group (co-housed vs virgin)

```
model6 <- glmer(Sugar.fed_binary ~ Day * Group + (1 | BioID),
  data = mosquito_data,
  family = binomial)
```

**Model summary:**

| Characteristic     | Odds         | Probability (%) | OR <sup>†</sup> | 95% CI                                            | p-value |
|--------------------|--------------|-----------------|-----------------|---------------------------------------------------|---------|
| <b>Day</b>         |              |                 |                 |                                                   |         |
| DB1                | 0.02         | 2.0             | —               | —                                                 |         |
| DB2                | 0.05         | 4.8             | 3.13            | 0.83, 11.8                                        | 0.093   |
| DB3                | 10.11        | 91.0            | 631***          | 180, 2,219                                        | <0.001  |
| DB4                | 389103395.39 | 100.0           | 24,298,538,607  | 0.00, 347,082,619,877,364,307,044,218,276,151,296 | 0.358   |
| <b>Group</b>       |              |                 |                 |                                                   |         |
| co-housed          | 0.02         | 2.0             | —               | —                                                 |         |
| virgin             | 0.22         | 18.0            | 13.6***         | 4.12, 45.2                                        | <0.001  |
| <b>Day * Group</b> |              |                 |                 |                                                   |         |
| DB2 * virgin       | 0.12         | 10.7            | 7.21**          | 1.74, 29.8                                        | 0.006   |
| DB3 * virgin       | 0.01         | 1.0             | 0.43            | 0.08, 2.17                                        | 0.306   |
| DB4 * virgin       | 0.00         | 0.0             | 0.00            | 0.00, 124,369,836,581,060                         | 0.476   |

<sup>†</sup> \*p<0.05; \*\*p<0.01; \*\*\*p<0.001  
Abbreviations: CI = Confidence Interval, OR = Odds Ratio

(note: PBM abbreviated as “B”)

## Post-hoc analysis via estimated marginal means (EM means)

### 1) Age-effects within each group (p-value adjustment: Tukey's method)

Group = co-housed:

| contrast  | estimate | SE     | df  | z.ratio | p.value |
|-----------|----------|--------|-----|---------|---------|
| DB1 - DB2 | -1.14    | 0.678  | Inf | -1.680  | 0.3343  |
| DB1 - DB3 | -6.45    | 0.641  | Inf | -10.055 | <.0001  |
| DB1 - DB4 | -23.91   | 26.000 | Inf | -0.919  | 0.7948  |
| DB2 - DB3 | -5.31    | 0.433  | Inf | -12.246 | <.0001  |
| DB2 - DB4 | -22.77   | 26.000 | Inf | -0.875  | 0.8179  |
| DB3 - DB4 | -17.47   | 26.000 | Inf | -0.671  | 0.9081  |

Group = virgin:

| contrast  | estimate | SE    | df  | z.ratio | p.value |
|-----------|----------|-------|-----|---------|---------|
| DB1 - DB2 | -3.12    | 0.257 | Inf | -12.141 | <.0001  |
| DB1 - DB3 | -5.60    | 0.539 | Inf | -10.387 | <.0001  |
| DB1 - DB4 | -5.35    | 0.491 | Inf | -10.896 | <.0001  |
| DB2 - DB3 | -2.49    | 0.538 | Inf | -4.623  | <.0001  |
| DB2 - DB4 | -2.24    | 0.489 | Inf | -4.569  | <.0001  |
| DB3 - DB4 | 0.25     | 0.679 | Inf | 0.368   | 0.9830  |

Results are given on the log odds ratio (not the response) scale.

P value adjustment: tukey method for comparing a family of 4 estimates

### 2) Pair-wise comparison at each day (p-value adjustment: Bonferroni method)

|                      |          |       |     |         |         |
|----------------------|----------|-------|-----|---------|---------|
| Day = DB1:           |          |       |     |         |         |
| contrast             | estimate | SE    | df  | z.ratio | p.value |
| (co-housed) - virgin | -2.61    | 0.611 | Inf | -4.275  | <.0001  |
| Day = DB2:           |          |       |     |         |         |
| contrast             | estimate | SE    | df  | z.ratio | p.value |
| (co-housed) - virgin | -4.59    | 0.398 | Inf | -11.523 | <.0001  |
| Day = DB3:           |          |       |     |         |         |
| contrast             | estimate | SE    | df  | z.ratio | p.value |
| (co-housed) - virgin | -1.77    | 0.562 | Inf | -3.141  | 0.0017  |

|                      |          |        |     |         |         |
|----------------------|----------|--------|-----|---------|---------|
| Day = DB4:           |          |        |     |         |         |
| contrast             | estimate | SE     | df  | z.ratio | p.value |
| (co-housed) - virgin | 15.95    | 26.000 | Inf | 0.613   | 0.5401  |

Results are given on the log odds ratio (not the response) scale.

(note: PBM abbreviated as "B")

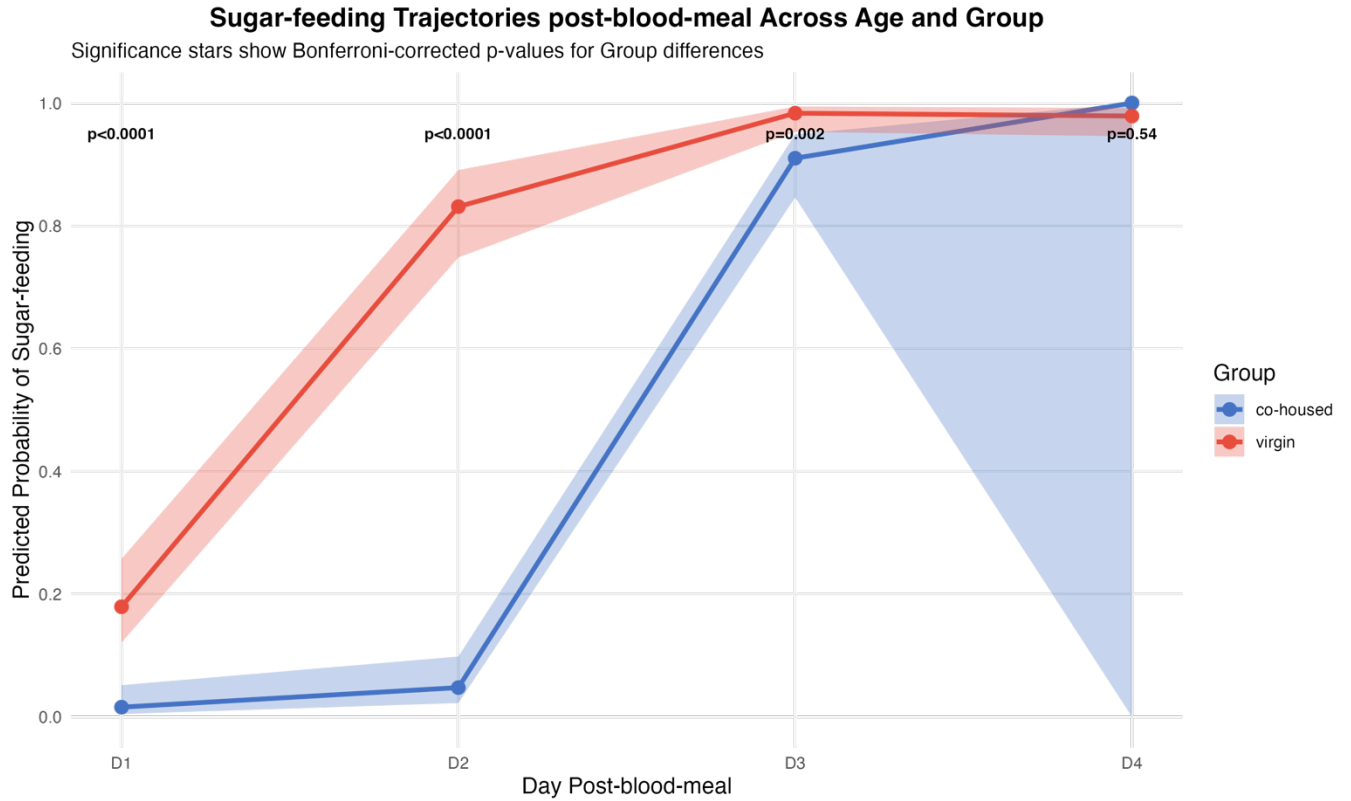

Conclusions: Both virgins and co-housed females (assumed mated) show a repressed appetite for sugar immediately after a blood meal (D1 post-blood meal). This repression is significantly stronger in mated females. Virgins start to regain their appetite by D2 post-blood meal, while the mated females continue to suppress it. By D3 post-blood meal, the appetite is restored for both groups.
